# Supplementary material for: The association between weekly hours of physical activity and mental health: A three-year follow-up study of 15–16-year-old students in the city of Oslo, Norway
Source: PubMed Central journal article supplement (PMC1955440; doi:10.1186/1471-2458-7-155), 2007-07-12

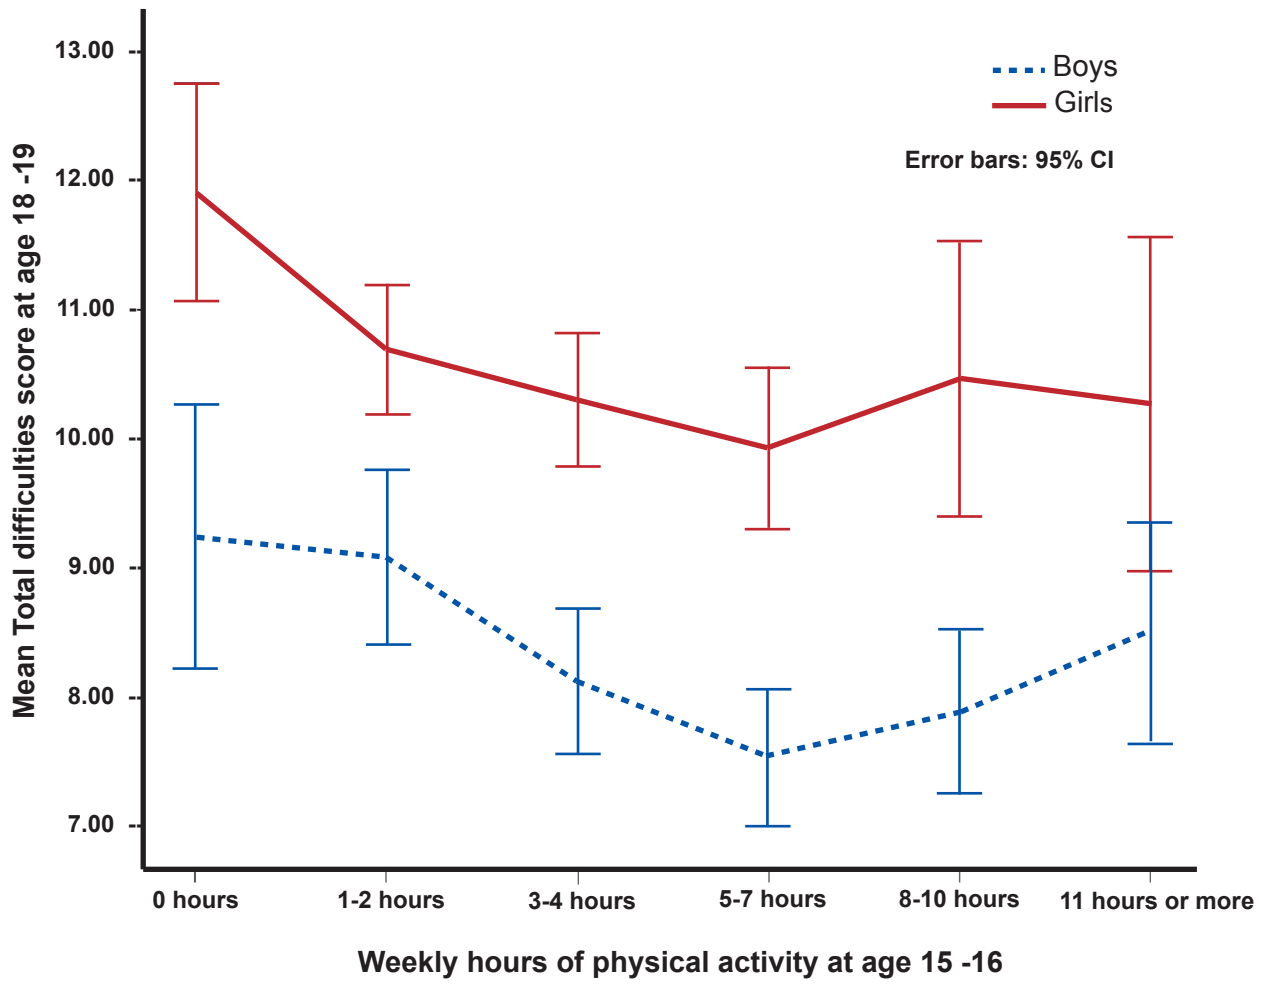

Supplement: 1471-2458-7-155-S2.pdf [file 1471-2458-7-155-S2.pdf]
